# Supplementary material
Source: PubMed Central journal article supplement (PMC4499002)
Supplement: NIHMS665332-supplement-253_2015_6443_MOESM1_ESM.pdf [file NIHMS665332-supplement-253_2015_6443_MOESM1_ESM.pdf]

**Journal:** Applied Microbiology and Biotechnology

**Title:** Discovery of novel *S. aureus* autolysins and molecular engineering to enhance bacteriolytic activity

**Authors**

Daniel C. Osipovitch<sup>1\*</sup>, Sophie Therrien<sup>2</sup>, Karl E. Griswold<sup>3\*,4\*</sup>

1 Program in Experimental and Molecular Medicine, 2 New England College, Henniker NH 03242, 3 Thayer School of Engineering, 4 Program in Molecular and Cellular Biology

\*Dartmouth College, Hanover NH 03755, USA.

\* email: karl.e.griswold@dartmouth.edu; phone: 603-646-2127; fax: 603-646-2277

**Table S1** List of primers used for cloning.

| Construct Name            | 5' Primer*                                       | 3' Primer*                                    |
|---------------------------|--------------------------------------------------|-----------------------------------------------|
| LytH <sub>Full</sub>      | ATAGCACCATGGCGGAAGATAGTGGGAACAT<br>CACG          | TCGAATTCGGATCCTTACGCAGAAAAATAAA<br>TTTTAAGGCC |
| LytH <sub>MurNAc</sub>    | TGCATAGCACCATGGCGACAAATTTAGATAT<br>TGTCGC        | TGCATAGCACCATGGCGACAAATTTAGATAT<br>TGTCGC     |
| LytO <sub>Full</sub>      | ATCGTCGATCCATGGCGCAAGCAAATAAAC                   | TAGTCAGTCGGATCCTTAACTGATTTCTCCC<br>CATAAG     |
| LytO <sub>PGRP-SH3</sub>  | ATCGTCGATCCATGGCGACAGCTAAGCCAC                   | TAGTCAGTCGGATCCTTAACTGATTTCTCCC<br>CATAAG     |
| LytO <sub>CHAP</sub>      | ATCGTCGATCCATGGCGCAAGCAAATAAAC                   | TAGTCAGTCGGATCCTTATTCTTTTTTAGGT<br>GCTTG      |
| LytO <sub>CHAP-PGRP</sub> | ATCGTCGATCCATGGCGCAAGCAAATAAAC                   | TAGTCAGTCGGATCCTTAAAGCGCTTGAC                 |
| SsaALP <sub>Full</sub>    | ATCGTCGATCCATGGCGTCTACACAACATAC                  | TAGTCAGTCGGATCCTTAAATGGATGAATGCA<br>TAG       |
| SsaALP <sub>CHAP</sub>    | ATCGTCGATCCATGGCGTCAGGTGGTAC                     | TAGTCAGTCGGATCCTTAAATGGATGAATGCA<br>TAG       |
| LDP <sub>Full</sub>       | ATTCATAATCCATGGCGCAACAACATGGC                    | CGGAGCTCGAATTCGGATCCTTAGTGGATGT<br>AATTATA    |
| LDP <sub>CHAP</sub>       | ATATTCATAATCCATGGCGGCATACAAACCT<br>GC            | CGGAGCTCGAATTCGGATCCTTAGTGGATGT<br>AATTATA    |
| PH <sub>Full</sub>        | TGCATAGCACCATGGCGTTGATAACAAAAAA<br>CCAAGC        | TCGAATTCGGATCCCTAAATCGTGCTAAACT<br>TACCAAAAC  |
| PH <sub>MurNAc-SH3</sub>  | TGCATAGCACCATGGCGGATAAAGTAAGTGT<br>TGG           | TCGAATTCGGATCCCTAAATCGTGCTAAACT<br>TACCAAAAC  |
| PH <sub>CHAP-MurNAc</sub> | TGCATAGCACCATGGCGTTGATAACAAAAAA<br>CCAAGC        | GCTCGAATTCGGATCCCTAATTACCAGCTAC<br>C          |
| PH <sub>CHAP</sub>        | TGCATAGCACCATGGCGTTGATAACAAAAAA<br>CCAAGC        | GCTCGAATTCGGATCCCTAATCTGGGAAATT<br>TAATC      |
| PH <sub>MurNAc</sub>      | TGCATAGCACCATGGCGGATAAAGTAAGTGT<br>TGG           | GCTCGAATTCGGATCCCTAATTACCAGCTAC<br>C          |
| LBD <sub>Vector</sub>     | ATCTGATAACATATGCCATGGAATCATGGAT<br>CCGCAGGATATGG | TTTGTACATAAGCTTTCACCTTTATAG                   |
| LytH-LBD                  | ATAGCACCATGGCGGAAGATAGTGGGAACAT<br>CACG          | TCGAATTCGGATCCCGCAGAAAAATAAATTT<br>TAAGGCC    |
| LytO-LBD                  | ATAGCACCATGGCGGAAGATAGTGGGAACAT<br>CACG          | TAGTCAGTCGGATCCTGATCGTGGCGCTG                 |
| SsaALP-LBD                | ATCGTCGATCCATGGCGTCAGGTGGTAC                     | TAGTCAGTCGGATCCATGGATGAATGCATAG               |
| LDP-LBD                   | ATATTCATAATCCATGGCGGCATACAAACCT<br>GC            | CGGAGCTCGAATTCGGATCCGTGGATGTAAT<br>TATA       |
| PH-LBD                    | TGCATAGCACCATGGCGTTGATAACAAAAAA<br>CCAAGC        | GCTCGAATTCGGATCCATCTGGGAAATTTAA<br>TC         |

\*All primers are written in the 5' to 3' direction.

**Table S2** Biochemical information and purification notes for each autolysin construct.

| Construct Name            | Molecular Mass* (kD) | Theoretical pI* | Extinction Coefficient* (M <sup>-1</sup> cm <sup>-1</sup> ) | Soluble? | Typical Purified Yield (mg L <sup>-1</sup> ) | Purification Notes                                   |
|---------------------------|----------------------|-----------------|-------------------------------------------------------------|----------|----------------------------------------------|------------------------------------------------------|
| LytH <sub>Full</sub>      | 29.3                 | 6.18            | 38390                                                       | Y        | 2                                            | Ni Only                                              |
| LytH <sub>MurNAc</sub>    | 22.5                 | 6.35            | 18910                                                       | Y        | 2                                            | Ni Only                                              |
| LytO <sub>Full</sub>      | 55.1                 | 8.63            | 130750                                                      | Y        | 1                                            |                                                      |
| LytO <sub>PGRP-SH3</sub>  | 35.9                 | 9.11            | 69330                                                       | Y        | 7                                            | 300mM NaCl                                           |
| LytO <sub>CHAP</sub>      | 19.3                 | 6.02            | 61420                                                       | Y        | 4                                            | Ni only                                              |
| LytO <sub>CHAP-PGRP</sub> | 43.1                 | 8.65            | 89840                                                       | Y        | 4                                            | ---                                                  |
| SsaALP <sub>Full</sub>    | 26.9                 | 6.22            | 44350                                                       | Y        | 1.5                                          | Ni resin turns bright purple upon binding of protein |
| SsaALP <sub>CHAP</sub>    | 15.2                 | 6.47            | 34380                                                       | Y        | 3                                            | ---                                                  |
| LDP <sub>Full</sub>       | 29.1                 | 9.98            | 34840                                                       | Y        | 1.5                                          | 350 mM NaCl elution                                  |
| LDP <sub>CHAP</sub>       | 15.6                 | 9.68            | 27390                                                       | Y        | 0.5                                          | ---                                                  |
| PH <sub>Full</sub>        | 54.9                 | 9.24            | 87670                                                       | Y        | 1                                            | 300 mM NaCl elution                                  |
| PH <sub>MurNAc-SH3</sub>  | 37.5                 | 9.49            | 49280                                                       | N        | 0                                            | ---                                                  |
| PH <sub>CHAP-MurNAc</sub> | 42.8                 | 8.56            | 67270                                                       | N        | 0                                            | ---                                                  |
| PH <sub>CHAP</sub>        | 18.8                 | 6.48            | 38390                                                       | N        | 0                                            | ---                                                  |
| PH <sub>MurNAc</sub>      | 25.4                 | 9.02            | 28880                                                       | N        | 0                                            | ---                                                  |
| LytH-LBD                  | 34.5                 | 8.92            | 49850                                                       | Y        | 1                                            | ---                                                  |
| LytA-LBD                  | 31.3                 | 8.75            | 92360                                                       | Y        | 2                                            | ---                                                  |
| SsaALP-LBD                | 27.2                 | 9.16            | 65320                                                       | Y        | 0.6                                          | ---                                                  |
| LDP-LBD                   | 27.6                 | 9.82            | 58330                                                       | N        | 0                                            | ---                                                  |
| PH-LBD                    | 30.8                 | 9.06            | 69330                                                       | Y        | 0.1                                          | Ni Only                                              |

\*Calculated by ExPASy ProtParam tool

**Table S3** All results from the SMART Domain Search

| <b>SMART Query</b> | <b>UniProt Accession Number</b> | <b>Submitted Name</b>                   |
|--------------------|---------------------------------|-----------------------------------------|
| LysM               | Q2G0D4                          | Secretory antigen SsaA-like protein     |
|                    | Q2G278                          | LysM Domain Protein                     |
|                    | Q9ZNI1                          | Probable Cell Wall Hydrolase LytN       |
|                    | P02976                          | Immunoglobulin G-binding protein A      |
|                    | Q2FYF1                          | Elastin-binding protein EbpS            |
|                    | Q2G0U9                          | N-acetylmuramoyl-L-alanine amidase sle1 |
| SH3                | Q2FWV4                          | Peptidoglycan hydrolase, putative       |
|                    | Q2FX77                          | Autolysin                               |
|                    | Q2FXU3                          | Probable cell wall amidase LytH         |
|                    | Q2FYD8                          | Petidoglycan hydrolase, putative        |

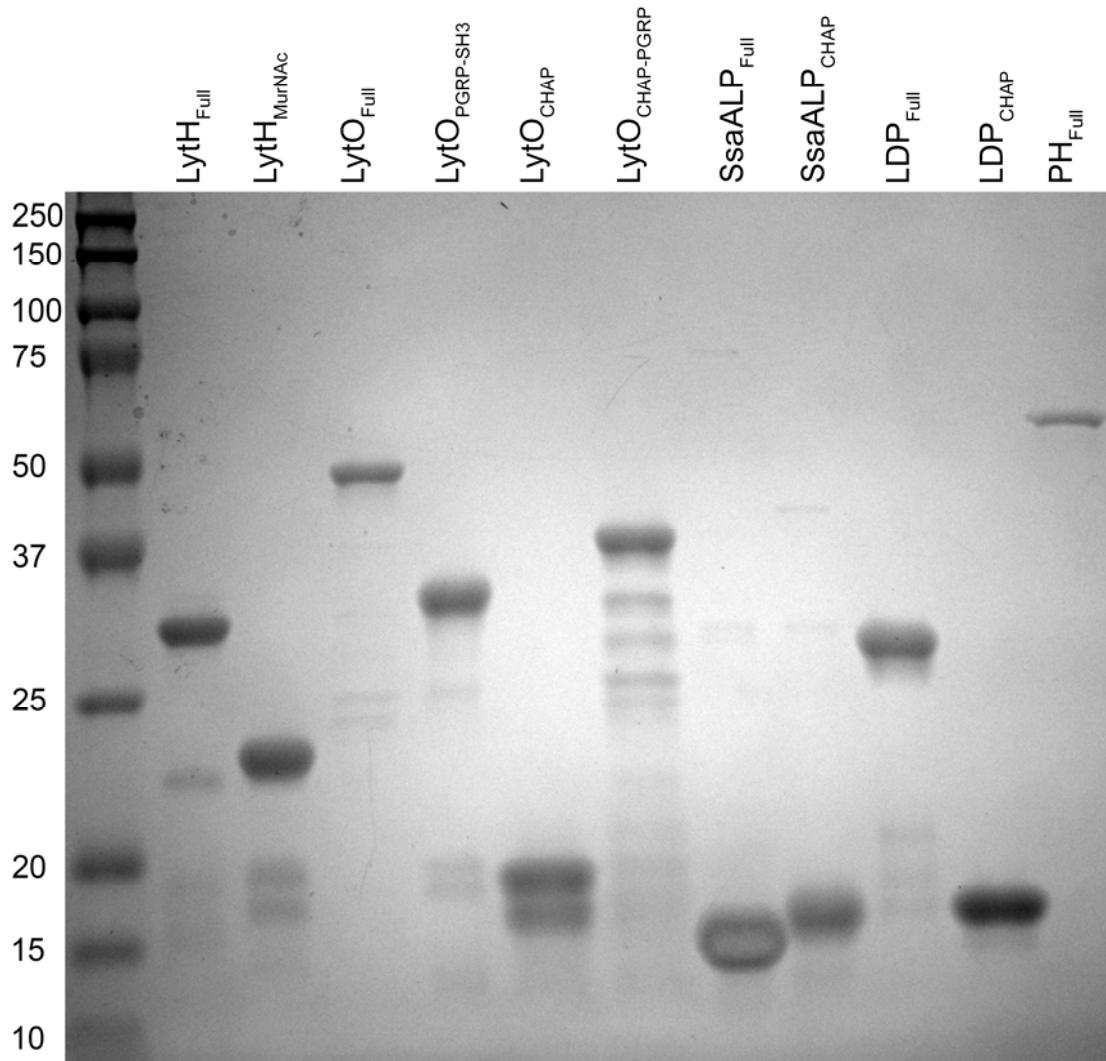

**Figure S1** Representative SDS-PAGE gel of purified autolysins. The numbers on the left represent the molecular mass in kDa of the Precision Plus Protein Kaleidoscope ladder, and lanes are labeled by construct name.

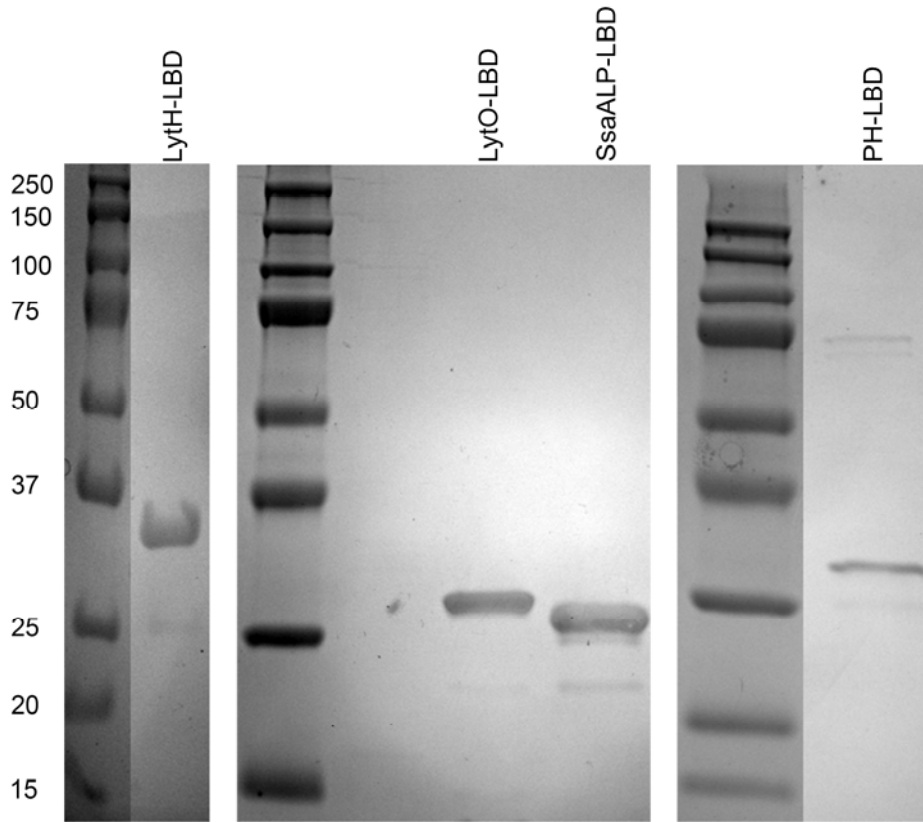

**Figure S2** Representative SDS-PAGE gel depicting purification of chimeric enzymes. Numbers on the left denote the molecular mass in kDa of the Precision Plus Protein Kaleidoscope ladder seen on the left side of each panel. Lanes are labeled by construct name.

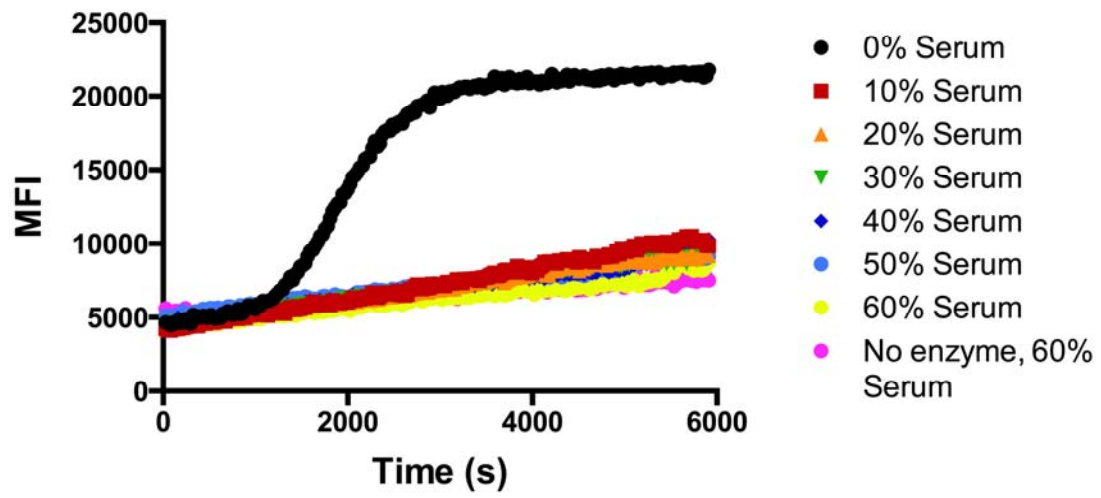

**Figure S3** Representative kinetic curves of SsaALP-LBD in the presence of human serum.
